# Supplementary material
Source: PubMed Central journal article supplement (PMC5555578)
Supplement: NIHMS893051-supplement-Supporting_Information.pdf [file NIHMS893051-supplement-Supporting_Information.pdf]

## Supporting Information

### Dual Mode of Action for Plusbacin A<sub>3</sub> in *Staphylococcus aureus*

Robert D. O'Connor,<sup>#</sup> Manmilan Singh,<sup>#</sup> James Chang,<sup>†</sup>

Sung Joon Kim,<sup>†</sup> Michael VanNieuwenhze,<sup>‡</sup> and Jacob Schaefer<sup>#,\*</sup>

<sup>#</sup>Department of Chemistry, Washington University, St. Louis, MO 63130, <sup>†</sup>Department of Chemistry and Biochemistry, Baylor University, Waco, TX 76798, and the <sup>‡</sup>Department of Chemistry, Indiana University, Bloomington, IN 47405.

#### ATP-leakage assay

An ATP-leakage assay was performed on overnight culture of *S. aureus* (ATCC 6538P) grown in TSB harvested at OD<sub>600nm</sub> 1.5. *S. aureus* was pelleted and then resuspended in phosphate buffered saline (PBS) supplemented with 20 mM Ca<sup>2+</sup>. Plusbacin A<sub>3</sub> and vancomycin were respectively added to the suspension to final drug concentrations of 0, 0.25, 0.5, 1, 5, 50, and 100 μg/ml (plusbacin A<sub>3</sub>), or 0, 1, 2, 5, 10, 50, and 100 μg/ml (vancomycin). As a control, daptomycin was added to the suspension at a final concentration of 100 μg/ml. The antibiotic-treated cells were incubated for 20 minutes at 37 °C and the supernatant containing ATP was collected following a brief centrifugation. The ATP that was leaked to the supernatant was quantified by adding 100 μL of CellTiter-Glo® 2.0 reagents (Promega, Madison WI) to an equal

volume of supernatant. After 10 min equilibration at room temperature, luminescence was measured using a Fluoroskan Ascent FL Luminometer (Thermo Scientific) with an integration time of 200 ms.

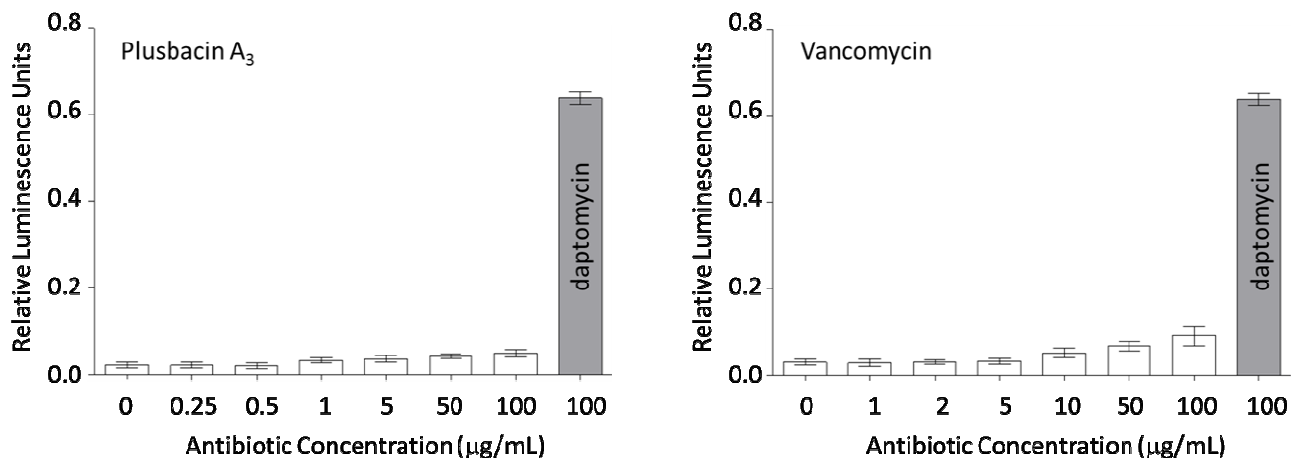

**Supplementary Figure S1. ATP leakages from *S. aureus* treated with plusbacin A<sub>3</sub> and vancomycin.** ATP leakage was induced to *S. aureus* harvested at OD<sub>660nm</sub> 1.5 by the addition of plusbacin A<sub>3</sub> (left) to final concentrations of 0, 0.25, 0.5, 1, 5, 50, and 100 µg/ml, and vancomycin (right) to final concentrations of 0, 1, 2, 5, 10, 50, and 100 µg/ml. ATP leakage from *S. aureus* treated with daptomycin at 100 µg/ml is shown as a positive control. *S. aureus* treated with plusbacin A<sub>3</sub> or vancomycin did not induce significant ATP leakage which suggests that neither drug targets the bacterial membrane.
